# Supplementary material for: Comprehensive Analyses of Advanced Glycation end Products and Heterocyclic Amines in Peanuts during the Roasting Process
Source: MDPI journal article supplement (doi:10.3390/molecules28207012), 2023-10-10
Supplement: s1 [file s1]

# Comprehensive Analyses of Advanced Glycation end Products and Heterocyclic Amines in Peanuts during the Roasting Process

Jingjing Yu <sup>1,\*</sup>, Xiaohui Yu <sup>2</sup>, Lili Shi <sup>2</sup> and Wei Liu <sup>2,\*</sup>

**Table S1.** The contents of reducing sugars in peanuts after roasting process (g/kg).

| Peanut    | Roasting time | 160°C                   | 180°C                   | 200°C                   |
|-----------|---------------|-------------------------|-------------------------|-------------------------|
| C-peanut  | 0min          | 2.23±0.01 <sup>a</sup>  | 2.23±0.01 <sup>a</sup>  | 2.23±0.01 <sup>a</sup>  |
|           | 10min         | 2.17±0.04 <sup>ab</sup> | 2.01±0.15 <sup>bc</sup> | 1.84±0.10 <sup>b</sup>  |
|           | 15min         | 2.10±0.07 <sup>b</sup>  | 2.15±0.06 <sup>ab</sup> | 1.87±0.02 <sup>b</sup>  |
|           | 20min         | 2.12±0.07 <sup>ab</sup> | 2.11±0.07 <sup>ab</sup> | 1.84±0.01 <sup>b</sup>  |
|           | 25min         | 2.09±0.06 <sup>b</sup>  | 1.86±0.02 <sup>cd</sup> | 2.14±0.03 <sup>a</sup>  |
|           | 30min         | 2.20±0.01 <sup>ab</sup> | 1.77±0.03 <sup>d</sup>  | 2.28±0.11 <sup>a</sup>  |
| HO-peanut | 0min          | 2.44±0.10 <sup>ab</sup> | 2.44±0.10 <sup>a</sup>  | 2.44±0.10 <sup>c</sup>  |
|           | 10min         | 2.24±0.04 <sup>b</sup>  | 2.32±0.04 <sup>b</sup>  | 2.45±0.05 <sup>c</sup>  |
|           | 15min         | 2.37±0.11 <sup>ab</sup> | 2.37±0.07 <sup>ab</sup> | 2.32±0.06 <sup>cd</sup> |
|           | 20min         | 2.46±0.13 <sup>a</sup>  | 2.29±0.03 <sup>bc</sup> | 2.25±0.09 <sup>d</sup>  |
|           | 25min         | 2.41±0.06 <sup>ab</sup> | 2.20±0.03 <sup>bc</sup> | 2.74±0.02 <sup>b</sup>  |
|           | 30min         | 2.44±0.01 <sup>ab</sup> | 2.35±0.11 <sup>ab</sup> | 3.38±0.08 <sup>a</sup>  |

a–d: Different letters indicate significant differences ( $p < 0.05$ ). The data are shown as mean  $\pm$  SD,  $n = 3$ .

|                  |       | 160°C | 180°C | 200°C |
|------------------|-------|-------|-------|-------|
| <b>C-peanut</b>  | 0min  | 2.23  | 2.23  | 2.23  |
|                  | 10min | 2.17  | 2.01  | 1.84  |
|                  | 15min | 2.1   | 2.15  | 1.87  |
|                  | 20min | 2.12  | 2.11  | 1.84  |
|                  | 25min | 2.09  | 1.86  | 2.14  |
|                  | 30min | 2.2   | 1.77  | 2.28  |
| <b>HO-peanut</b> | 0min  | 2.44  | 2.44  | 2.44  |
|                  | 10min | 2.24  | 2.32  | 2.45  |
|                  | 15min | 2.37  | 2.37  | 2.32  |
|                  | 20min | 2.46  | 2.29  | 2.25  |
|                  | 25min | 2.41  | 2.2   | 2.74  |
|                  | 30min | 2.44  | 2.35  | 3.38  |

**Figure S1.** The contents of reducing sugars in peanuts after roasting process (g/kg)
